# Supplementary material for: Evidence for isolated evolution of deep-sea ciliate communities through geological separation and environmental selection
Source: PubMed Central journal article supplement (PMC3707832; doi:10.1186/1471-2180-13-150), 2013-07-08

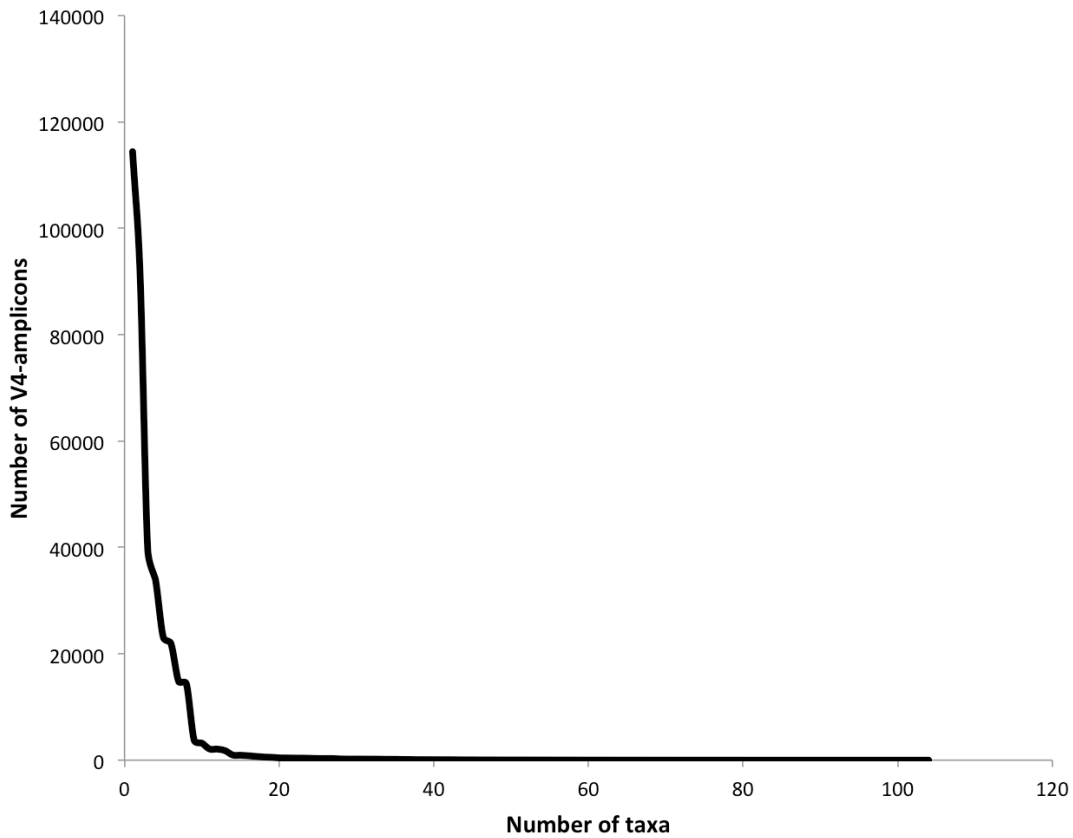

Supplement: 1471-2180-13-150-S2.pdf [file 1471-2180-13-150-S2.pdf]
